# Supplementary material
Source: HighWire-hosted journal article supplement (https://tobaccocontrol.bmj.com/highwire/filestream/169035/field_highwire_adjunct_files/0/tc-2024-058718supp001_data_supplement.pdf)
Supplement: tc-2024-058718supp001_data_supplement.pdf [file tc-2024-058718supp001_data_supplement.pdf]

## Supplement A: Search Strategy

To support reproducibility and transparent reporting, all search strategies are available via an institutional repository (<http://hdl.handle.net/10342/12598>). As the publication of literature on this topic began in 2002,<sup>1</sup> our search was limited to records published in 2000 or after and was implemented in 10 databases: MEDLINE via PubMed, PsycINFO (EBSCO), Global Health (EBSCO), LILACS, Embase (Embase.com), ABI/Inform (ProQuest), CINAHL (EBSCO), Business Source Complete (EBSCO), Web of Science, and Scopus. We additionally assessed grey literature by conducting searches through the New York Academy Medicine Grey Literature database, Google Custom Search for non-governmental organization publications, Dissertations and Theses through ProQuest and the RAND Publication Database. No additional filters or limits beyond publication date were applied to the search except for the databases Business Source Complete and ABI/Inform; the limits for those databases are provided with the complete search strategies. Additional references were identified through expert review of non-indexed journals, and one article was identified through backwards reference searching. We last updated the search on November 10, 2022. Records were de-duplicated in EndNote<sup>2</sup> and then loaded into Covidence for further de-duplication.

### The final MEDLINE/PubMed search was:

("Tobacco Industry"[Mesh] OR "Tobacco Products"[Mesh] OR "Tobacco"[Mesh] OR "Smoking"[Mesh] OR Tobacco[tiab] OR Tobacconist[tiab] OR Tobacconists[tiab])

**AND**

("Commerce"[Mesh] OR "Marketing"[Mesh] OR Outlet[tiab] OR Outlets[tiab] OR Retail[tiab] OR Retailer[tiab] OR Retailers[tiab] OR "point of sale"[tiab] OR "point-of-sale"[tiab] OR "points of sale"[tiab] OR "points-of-sale"[tiab] OR Vendor[tiab] OR Vendors[tiab] OR Shop[tiab] OR Shops[tiab] OR Business[tiab] OR Businesses[tiab] OR Sale[tiab] OR Sales[tiab] OR Commercial[tiab] OR Market[tiab] OR Markets[tiab] OR Consumer[tiab] OR Consumers[tiab] OR Seller[tiab] OR Sellers[tiab] OR Store[tiab] OR stores[tiab])

**AND**

("Residence Characteristics"[Mesh] OR "Censuses"[Mesh] OR "Spatial analysis"[Mesh] OR "Geographic Mapping"[Mesh] OR "Demography"[Mesh] OR "Geopolitical Areas"[tiab] OR

Census[tiab] OR Censuses[tiab] OR Density[tiab] OR Proximity[tiab] OR Concentration[tiab] OR Distribution[tiab] OR Spatial [tiab] OR Neighborhood[tiab] OR Neighborhoods[tiab] OR Neighbourhood[tiab] OR Neighbourhoods[tiab] OR Zoning[tiab] OR Mapping[tiab] OR “zip code”[tiab] OR “zip codes”[tiab] OR Tract[tiab] OR Tracts[tiab] OR “area unit”[tiab] OR “area units”[tiab] OR Residential[tiab] OR Residence[tiab] OR County[tiab] OR counties[tiab] OR Cluster[tiab])

## References

1. Laws MB, Whitman J, Bowser DM, Krech L. Tobacco availability and point of sale marketing in demographically contrasting districts of Massachusetts. *Tob Control*. Jun 2002;11 Suppl 2(Suppl 2):ii71-3. doi:10.1136/tc.11.suppl\_2.ii71
2. Bramer WM, Giustini D, de Jonge GB, Holland L, Bekhuis T. De-duplication of database search results for systematic reviews in EndNote. *J Med Libr Assoc*. Jul 2016;104(3):240-3. doi:10.3163/1536-5050.104.3.014
